# Supplementary material for: Screen-printed microsystems for the ultrasensitive electrochemical detection of alkaline phosphatase
Source: Royal Society of Chemistry journal article supplement (doi:10.1039/c0an00001a), 2010-01-01
Supplement: c0an00001a.pdf [file c0an00001a.pdf]

## Screen-printed microsystems for the ultrasensitive electrochemical detection of alkaline phosphatase

Luz M. Santiago, Diego Bejarano-Nosas, Pablo Lozano-Sanchez\* and Ioannis Katakis

<sup>a</sup> Bioengineering and Bioelectrochemistry Group, Dept. d'Enginyeria Química, Escola Tècnica Superior d'Enginyeria Química, Universitat Rovira i Virgili, Av. Països Catalans 26, 43007 Tarragona, Spain.

\* Corresponding author; Fax: +34 977558623; Tel: +34 977558601; E-mail: pablo.lozano@urv.cat

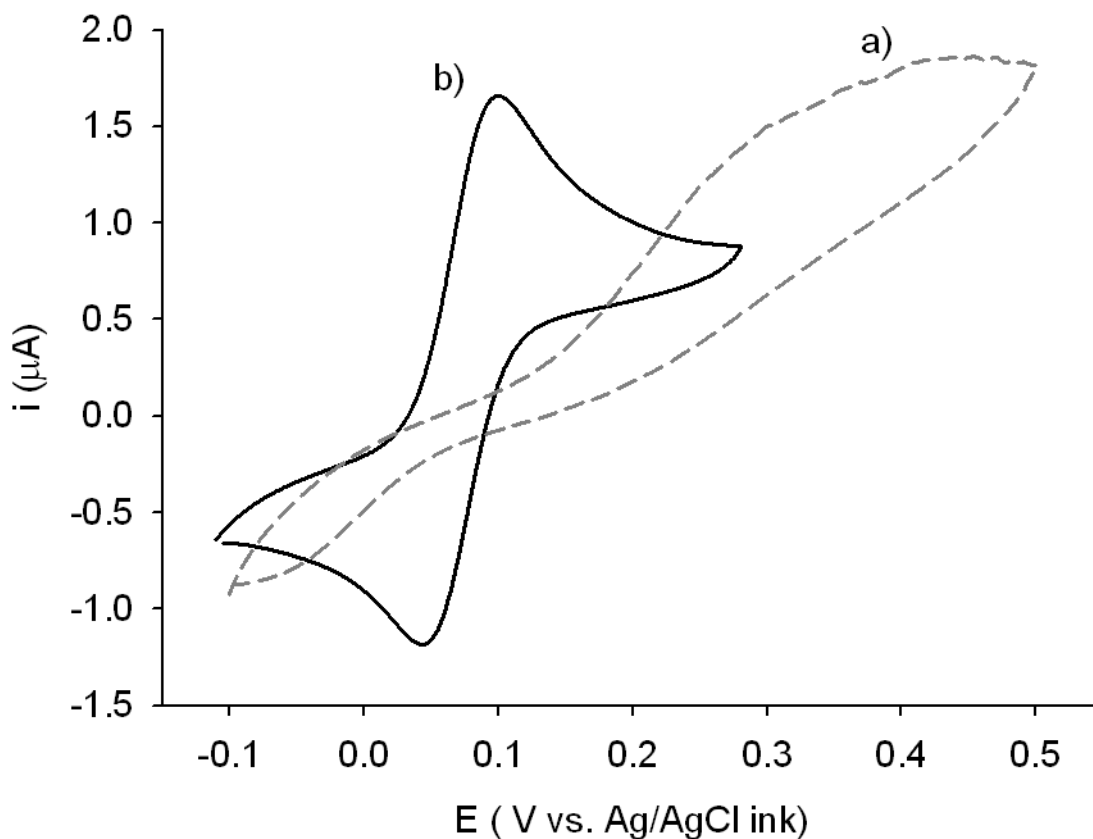

**Figure S1:** Cyclic voltammetry in 0.1 mM PAP of a) Untreated screen printed carbon microsystem b) After activation in  $\text{Na}_2\text{CO}_3$  saturated solution anodized at 1.2 V during 300 s. Scan rate 0.05 V/s

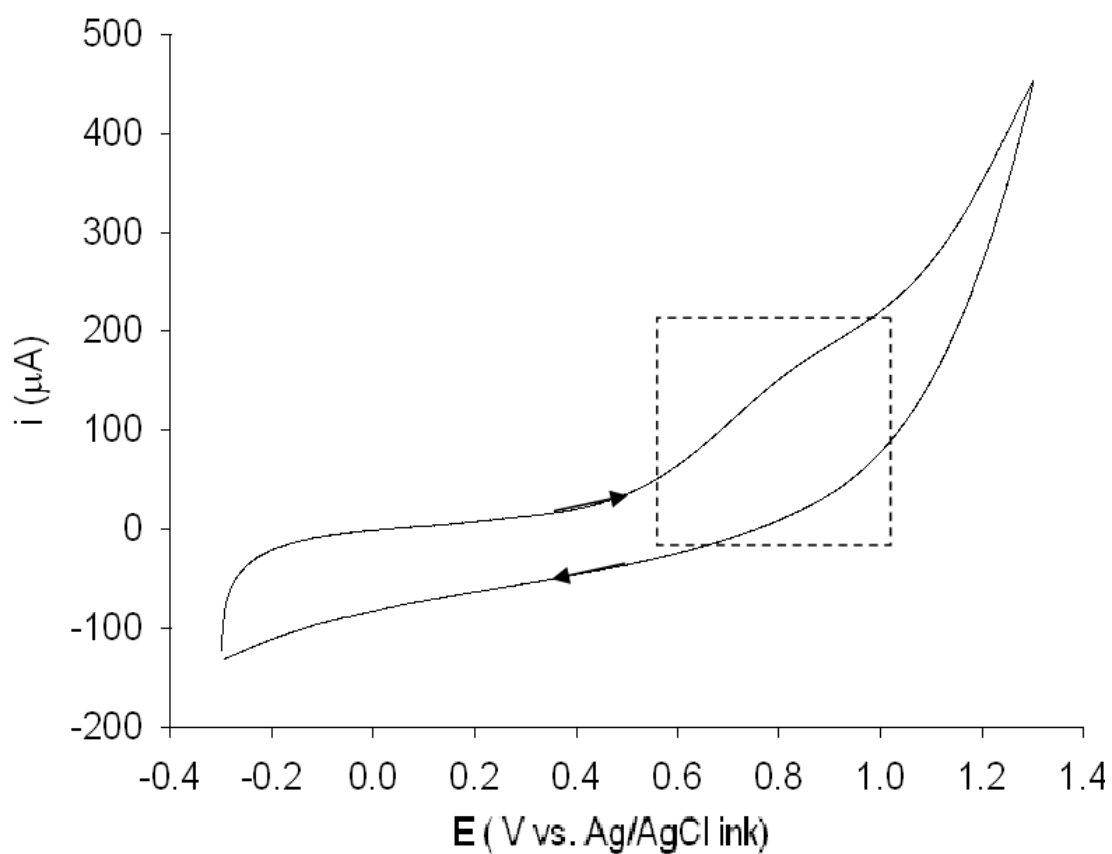

**Figure S2:** Cyclic voltammetry in 0.1 M pyrrole and potassium chloride in 0.1 M PBS pH 7.2 showing the pyrrole oxidative electropolymerisation zone. Scan rate 0.05 V/s.

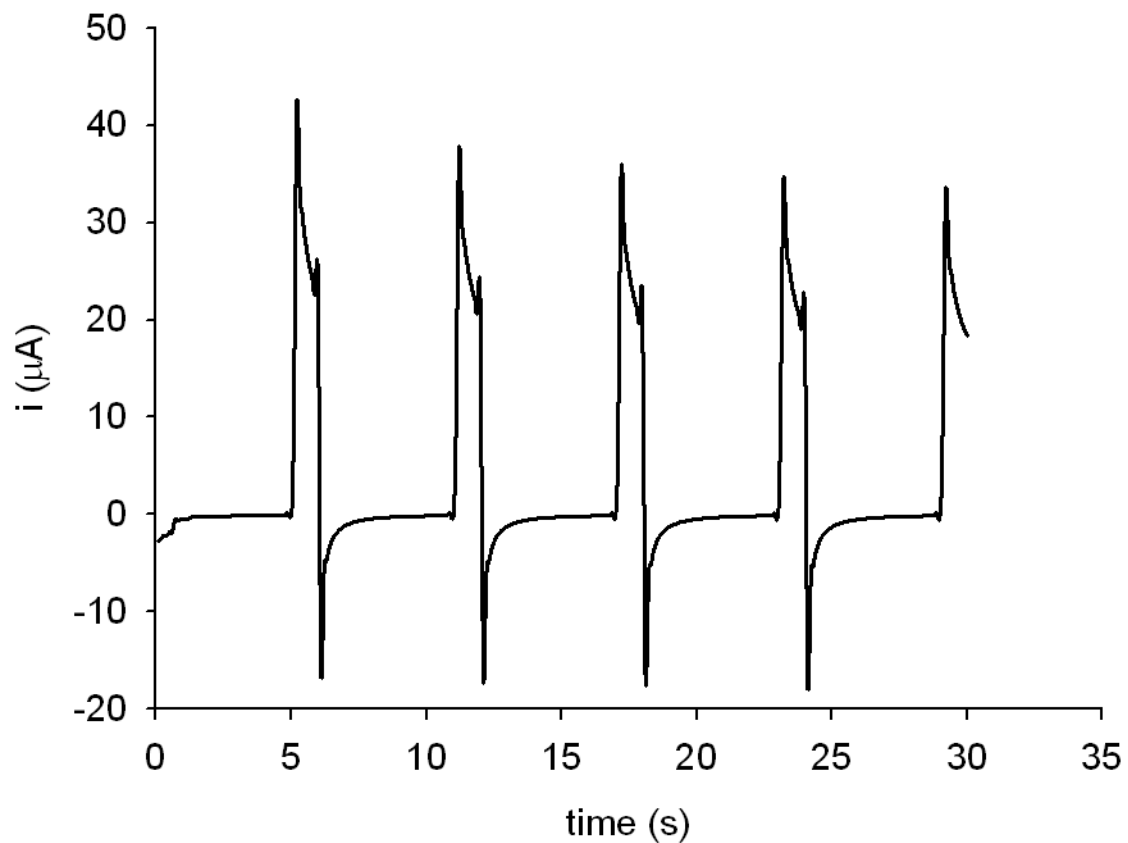

**Figure S3:** Typical pulse sequence for the electrochemical immobilization of polypyrrole/enzyme films at anodic potentials: 1s pyrrole oxidation pulse + 5 s resting time. (0.1 M pyrrole and potassium chloride in 0.1 M PBS pH 7.2)
